# Supplementary material for: The kinetics of the uptake of HNO3 on ice, solid H2SO4–H2O and solid ternary solutions of H2SO4–HNO3–H2O in the temperature range 180–211 K
Source: Royal Society of Chemistry journal article supplement (doi:10.1039/b100546o), 2001-01-01
Supplement: tables.pdf [file tables.pdf]

**The Kinetics of the Uptake of HNO<sub>3</sub> on Ice, Solid H<sub>2</sub>SO<sub>4</sub>/H<sub>2</sub>O and  
Solid Ternary Solutions of H<sub>2</sub>SO<sub>4</sub>/HNO<sub>3</sub>/H<sub>2</sub>O in the Temperature  
Range 180-211 K**

Arnaud Aguzzi and Michel J. Rossi

*Electronic Supplementary Information*

Table E.1: Uptake coefficient of HNO<sub>3</sub> at T = 180 K.

| Ice <sup>(a)</sup> | Flow<br>[molec. s <sup>-1</sup> ] | Dose<br>[molec.]       | Concentration<br>[molec. cm <sup>-3</sup> ] | k <sub>esc</sub><br>[s <sup>-1</sup> ] | k <sub>uni</sub><br>[s <sup>-1</sup> ] | γ <sub>obs</sub> | γ <sub>corr</sub> <sup>(b)</sup> |
|--------------------|-----------------------------------|------------------------|---------------------------------------------|----------------------------------------|----------------------------------------|------------------|----------------------------------|
| PV experiments     |                                   |                        |                                             |                                        |                                        |                  |                                  |
| B                  |                                   | 2.8 · 10 <sup>12</sup> | 1.4 · 10 <sup>9</sup>                       | 5.1                                    | 16.8                                   | 0.24             |                                  |
| B                  |                                   | 3.6 · 10 <sup>12</sup> | 1.8 · 10 <sup>9</sup>                       | 4.8                                    | 22.4                                   | 0.32             |                                  |
| B                  |                                   | 5.9 · 10 <sup>12</sup> | 3.0 · 10 <sup>9</sup>                       | 5.1                                    | 18.9                                   | 0.27             |                                  |
| B                  |                                   | 1.0 · 10 <sup>13</sup> | 5.0 · 10 <sup>9</sup>                       | 5.2                                    | 18.9                                   | 0.27             |                                  |
| B                  |                                   | 1.1 · 10 <sup>13</sup> | 5.5 · 10 <sup>9</sup>                       | 4.9                                    | 15.4                                   | 0.22             |                                  |
| B                  |                                   | 1.6 · 10 <sup>13</sup> | 8.0 · 10 <sup>9</sup>                       | 4.6                                    | 21.7                                   | 0.31             |                                  |
| B                  |                                   | 1.9 · 10 <sup>13</sup> | 9.5 · 10 <sup>9</sup>                       | 4.9                                    | 20.3                                   | 0.29             |                                  |
| B                  |                                   | 2.2 · 10 <sup>13</sup> | 1.1 · 10 <sup>10</sup>                      | 4.3                                    | 19.6                                   | 0.28             |                                  |
| B                  |                                   | 3.5 · 10 <sup>13</sup> | 1.8 · 10 <sup>10</sup>                      | 4.3                                    | 19.6                                   | 0.28             |                                  |
| B                  |                                   | 4.5 · 10 <sup>13</sup> | 2.3 · 10 <sup>10</sup>                      | 4.2                                    | 18.2                                   | 0.26             |                                  |
| B                  |                                   | 1.0 · 10 <sup>14</sup> | 5.0 · 10 <sup>10</sup>                      | 4.0                                    | 20.3                                   | 0.29             |                                  |
| SS experiments     |                                   |                        |                                             |                                        |                                        |                  |                                  |
| C                  | 9.9 · 10 <sup>12</sup>            |                        | 2.1 · 10 <sup>9</sup>                       | 2.4                                    | 14.0                                   | 0.20             | 0.27                             |
| B                  | 7.6 · 10 <sup>12</sup>            |                        | 2.7 · 10 <sup>9</sup>                       | 1.4                                    | 16.1                                   | 0.23             | 0.28                             |
| B                  | 1.5 · 10 <sup>13</sup>            |                        | 3.7 · 10 <sup>9</sup>                       | 2.0                                    | 18.9                                   | 0.27             | 0.32                             |
| C                  | 1.6 · 10 <sup>13</sup>            |                        | 4.4 · 10 <sup>9</sup>                       | 1.8                                    | 16.8                                   | 0.24             | 0.29                             |
| B                  | 3.1 · 10 <sup>13</sup>            |                        | 6.5 · 10 <sup>9</sup>                       | 2.4                                    | 20.3                                   | 0.29             | 0.31                             |
| B                  | 2.3 · 10 <sup>13</sup>            |                        | 6.7 · 10 <sup>9</sup>                       | 1.7                                    | 16.1                                   | 0.23             | -                                |
| B                  | 3.4 · 10 <sup>13</sup>            |                        | 7.0 · 10 <sup>9</sup>                       | 2.4                                    | 20.3                                   | 0.29             | -                                |
| B                  | 1.6 · 10 <sup>14</sup>            |                        | 4.0 · 10 <sup>10</sup>                      | 2.0                                    | 20.3                                   | 0.29             | 0.30                             |
| C                  | 1.7 · 10 <sup>14</sup>            |                        | 4.4 · 10 <sup>10</sup>                      | 2.0                                    | 18.9                                   | 0.27             | 0.31                             |
| C <sup>(c)</sup>   | 1.1 · 10 <sup>14</sup>            |                        | 4.6 · 10 <sup>10</sup>                      | 1.2                                    | 18.9                                   | 0.27             | 0.32                             |
| C                  | 5.0 · 10 <sup>15</sup>            |                        | 1.0 · 10 <sup>12</sup>                      | 2.4                                    | 20.3                                   | 0.29             | -                                |
| C                  | 5.1 · 10 <sup>15</sup>            |                        | 1.1 · 10 <sup>12</sup>                      | 2.3                                    | 21.7                                   | 0.31             | -                                |

<sup>(a)</sup> Symbols are explained in the text.

<sup>(b)</sup> The corrected uptake coefficient has been obtained using equation (9).

<sup>(c)</sup> Experiments performed using the 8 mm aperture reactor.

Table E.2: Uptake coefficient of  $\text{HNO}_3$  at  $T = 190$  K.

| Ice <sup>(a)</sup> | Flow<br>[molec. $\text{s}^{-1}$ ] | Dose<br>[molec.]    | Concentration<br>[molec. $\text{cm}^{-3}$ ] | $k_{\text{esc}}$<br>[ $\text{s}^{-1}$ ] | $k_{\text{uni}}$<br>[ $\text{s}^{-1}$ ] | $\gamma_{\text{obs}}$ | $\gamma_{\text{corr}}$ <sup>(b)</sup> |
|--------------------|-----------------------------------|---------------------|---------------------------------------------|-----------------------------------------|-----------------------------------------|-----------------------|---------------------------------------|
| PV experiments     |                                   |                     |                                             |                                         |                                         |                       |                                       |
| B                  |                                   | $3.1 \cdot 10^{12}$ | $1.6 \cdot 10^9$                            | 5.9                                     | 18.9                                    | 0.27                  |                                       |
| B                  |                                   | $1.3 \cdot 10^{13}$ | $6.5 \cdot 10^9$                            | 5.5                                     | 17.5                                    | 0.25                  |                                       |
| B                  |                                   | $1.6 \cdot 10^{13}$ | $8.0 \cdot 10^9$                            | 5.0                                     | 17.5                                    | 0.25                  |                                       |
| SS experiments     |                                   |                     |                                             |                                         |                                         |                       |                                       |
| B                  | $9.5 \cdot 10^{12}$               |                     | $2.3 \cdot 10^9$                            | 2.1                                     | 18.9                                    | 0.27                  | -                                     |
| B                  | $9.4 \cdot 10^{12}$               |                     | $2.6 \cdot 10^9$                            | 1.8                                     | 16.1                                    | 0.23                  | 0.27                                  |
| C                  | $1.0 \cdot 10^{14}$               |                     | $3.1 \cdot 10^{10}$                         | 1.6                                     | 18.2                                    | 0.26                  | 0.30                                  |
| B                  | $1.5 \cdot 10^{14}$               |                     | $3.3 \cdot 10^{10}$                         | 2.2                                     | 14.0                                    | 0.20                  | 0.21                                  |
| C                  | $4.9 \cdot 10^{14}$               |                     | $1.1 \cdot 10^{11}$                         | 2.2                                     | 18.9                                    | 0.27                  | -                                     |
| C                  | $5.3 \cdot 10^{15}$               |                     | $1.3 \cdot 10^{12}$                         | 2.1                                     | 16.8                                    | 0.25                  | -                                     |

<sup>(a)</sup> Symbols are explained in the text.

<sup>(b)</sup> The corrected uptake coefficient has been obtained using equation (9).

Table E.3: Uptake coefficient of  $\text{HNO}_3$  at  $T = 200$  K.

| Ice <sup>(a)</sup> | Flow<br>[molec. $\text{s}^{-1}$ ] | Dose<br>[molec.]    | Concentration<br>[molec. $\text{cm}^{-3}$ ] | $k_{\text{esc}}$<br>[ $\text{s}^{-1}$ ] | $k_{\text{uni}}$<br>[ $\text{s}^{-1}$ ] | $\gamma_{\text{obs}}$ | $\gamma_{\text{corr}}$ <sup>(b)</sup> |
|--------------------|-----------------------------------|---------------------|---------------------------------------------|-----------------------------------------|-----------------------------------------|-----------------------|---------------------------------------|
| PV experiments     |                                   |                     |                                             |                                         |                                         |                       |                                       |
| B                  |                                   | $3.3 \cdot 10^{12}$ | $1.7 \cdot 10^9$                            | 5.5                                     | 11.9                                    | 0.17                  |                                       |
| B                  |                                   | $6.2 \cdot 10^{12}$ | $3.1 \cdot 10^9$                            | 4.4                                     | 13.3                                    | 0.19                  |                                       |
| B                  |                                   | $8.6 \cdot 10^{12}$ | $4.3 \cdot 10^9$                            | 5.6                                     | 11.9                                    | 0.17                  |                                       |
| B                  |                                   | $1.3 \cdot 10^{13}$ | $6.5 \cdot 10^9$                            | 4.3                                     | 14.0                                    | 0.20                  |                                       |
| B                  |                                   | $2.6 \cdot 10^{13}$ | $1.3 \cdot 10^{10}$                         | 4.4                                     | 12.6                                    | 0.18                  |                                       |
| B                  |                                   | $3.7 \cdot 10^{13}$ | $1.9 \cdot 10^{10}$                         | 4.4                                     | 14.7                                    | 0.21                  |                                       |
| B                  |                                   | $3.8 \cdot 10^{13}$ | $1.9 \cdot 10^{10}$                         | 4.0                                     | 12.6                                    | 0.18                  |                                       |
| B                  |                                   | $1.0 \cdot 10^{14}$ | $5.0 \cdot 10^{10}$                         | 4.0                                     | 13.3                                    | 0.19                  |                                       |
| SS experiments     |                                   |                     |                                             |                                         |                                         |                       |                                       |
| B                  | $8.0 \cdot 10^{12}$               |                     | $1.6 \cdot 10^9$                            | 2.5                                     | 10.5                                    | 0.15                  | 0.18                                  |
| C                  | $1.1 \cdot 10^{13}$               |                     | $1.8 \cdot 10^9$                            | 3.0                                     | 11.9                                    | 0.17                  | -                                     |
| B                  | $8.8 \cdot 10^{12}$               |                     | $1.8 \cdot 10^9$                            | 2.5                                     | 10.5                                    | 0.15                  | 0.20                                  |
| C                  | $2.0 \cdot 10^{13}$               |                     | $3.7 \cdot 10^9$                            | 2.7                                     | 10.5                                    | 0.15                  | 0.16                                  |
| B                  | $1.7 \cdot 10^{13}$               |                     | $4.3 \cdot 10^9$                            | 2.0                                     | 12.6                                    | 0.18                  | 0.23                                  |
| B                  | $3.4 \cdot 10^{13}$               |                     | $1.1 \cdot 10^{10}$                         | 1.6                                     | 12.6                                    | 0.18                  | 0.23                                  |
| B                  | $3.0 \cdot 10^{13}$               |                     | $1.2 \cdot 10^{10}$                         | 1.3                                     | 9.8                                     | 0.14                  | 0.15                                  |
| C                  | $5.3 \cdot 10^{13}$               |                     | $1.2 \cdot 10^{10}$                         | 2.2                                     | 11.9                                    | 0.17                  | -                                     |
| B                  | $3.8 \cdot 10^{13}$               |                     | $1.4 \cdot 10^{10}$                         | 1.4                                     | 10.5                                    | 0.15                  | 0.18                                  |
| B                  | $1.2 \cdot 10^{14}$               |                     | $2.3 \cdot 10^{10}$                         | 2.2                                     | 11.2                                    | 0.16                  | 0.16                                  |
| B <sup>(c)</sup>   | $8.7 \cdot 10^{14}$               |                     | $3.4 \cdot 10^{10}$                         | 1.3                                     | 11.9                                    | 0.17                  | -                                     |
| C                  | $1.1 \cdot 10^{14}$               |                     | $3.8 \cdot 10^{10}$                         | 1.4                                     | 11.2                                    | 0.16                  | 0.17                                  |
| B                  | $1.9 \cdot 10^{14}$               |                     | $4.3 \cdot 10^{10}$                         | 2.2                                     | 14.0                                    | 0.20                  | -                                     |
| C <sup>(c)</sup>   | $1.3 \cdot 10^{15}$               |                     | $5.9 \cdot 10^{11}$                         | 1.1                                     | 9.8                                     | 0.15                  | -                                     |
| C                  | $3.9 \cdot 10^{15}$               |                     | $9.3 \cdot 10^{11}$                         | 2.1                                     | 11.2                                    | 0.16                  | -                                     |
| C                  | $4.8 \cdot 10^{15}$               |                     | $1.2 \cdot 10^{12}$                         | 2.0                                     | 12.6                                    | 0.18                  | -                                     |
| C                  | $5.6 \cdot 10^{15}$               |                     | $1.8 \cdot 10^{12}$                         | 1.6                                     | 13.3                                    | 0.19                  | -                                     |
| C <sup>(c)</sup>   | $8.3 \cdot 10^{15}$               |                     | $4.6 \cdot 10^{12}$                         | 0.9                                     | 11.2                                    | 0.16                  | -                                     |

<sup>(a)</sup> Symbols are explained in the text.

<sup>(b)</sup> The corrected uptake coefficient has been obtained using equation (9).

<sup>(c)</sup> Experiments performed using the 8 mm aperture reactor.

Table E.4: Uptake coefficient of  $\text{HNO}_3$  at  $T = 210$  K.

| Ice <sup>(a)</sup> | Flow<br>[molec. $\text{s}^{-1}$ ] | Dose<br>[molec.]    | Concentration<br>[molec. $\text{cm}^{-3}$ ] | $k_{\text{esc}}$<br>[ $\text{s}^{-1}$ ] | $k_{\text{uni}}$<br>[ $\text{s}^{-1}$ ] | $\gamma_{\text{obs}}$ | $\gamma_{\text{corr}}$ <sup>(b)</sup> |
|--------------------|-----------------------------------|---------------------|---------------------------------------------|-----------------------------------------|-----------------------------------------|-----------------------|---------------------------------------|
| PV experiments     |                                   |                     |                                             |                                         |                                         |                       |                                       |
| B                  |                                   | $4.7 \cdot 10^{12}$ | $2.4 \cdot 10^9$                            | 5.6                                     | 5.6                                     | 0.08                  |                                       |
| B                  |                                   | $1.0 \cdot 10^{13}$ | $5.0 \cdot 10^9$                            | 5.7                                     | 5.6                                     | 0.08                  |                                       |
| B                  |                                   | $2.9 \cdot 10^{13}$ | $1.5 \cdot 10^{10}$                         | 4.7                                     | 7.7                                     | 0.11                  |                                       |
| B                  |                                   | $7.6 \cdot 10^{13}$ | $3.8 \cdot 10^{10}$                         | 4.2                                     | 7.0                                     | 0.10                  |                                       |
| SS experiments     |                                   |                     |                                             |                                         |                                         |                       |                                       |
| B                  | $1.8 \cdot 10^{13}$               |                     | $3.6 \cdot 10^9$                            | 2.5                                     | 4.9                                     | 0.07                  | 0.08                                  |
| B                  | $2.5 \cdot 10^{13}$               |                     | $5.2 \cdot 10^9$                            | 2.4                                     | 3.5                                     | 0.05                  | 0.06                                  |
| B                  | $9.8 \cdot 10^{13}$               |                     | $2.0 \cdot 10^{10}$                         | 2.4                                     | 4.8                                     | 0.07                  | -                                     |

<sup>(a)</sup> Symbols are explained in the text.

<sup>(b)</sup> The corrected uptake coefficient has been obtained using equation (9).

Table E.5: Uptake coefficient of  $\text{HNO}_3$  at  $T = 211$  K.

| Ice <sup>(a)</sup> | Flow<br>[molec. $\text{s}^{-1}$ ] | Concentration<br>[molec. $\text{cm}^{-3}$ ] | $k_{\text{esc}}$<br>[ $\text{s}^{-1}$ ] | $k_{\text{uni}}$<br>[ $\text{s}^{-1}$ ] | $\gamma_{\text{obs}}$ | $\gamma_{\text{corr}}$ <sup>(b)</sup> |
|--------------------|-----------------------------------|---------------------------------------------|-----------------------------------------|-----------------------------------------|-----------------------|---------------------------------------|
| B                  | $9.4 \cdot 10^{12}$               | $3.6 \cdot 10^9$                            | 1.3                                     | 5.6                                     | 0.08                  | 0.09                                  |
| C                  | $1.5 \cdot 10^{14}$               | $2.9 \cdot 10^{10}$                         | 2.5                                     | 4.2                                     | 0.06 <sup>(c)</sup>   | -                                     |
| C                  | $2.1 \cdot 10^{14}$               | $4.4 \cdot 10^{10}$                         | 2.4                                     | 3.5                                     | 0.05 <sup>(c)</sup>   | -                                     |

<sup>(a)</sup> Symbols are explained in the text.

<sup>(b)</sup> The corrected uptake coefficient has been obtained using equation (9).

<sup>(c)</sup> Partial saturation of the ice sample has been observed.

Table E.6: Mean composition of the  $\text{HNO}_3 \cdot n\text{H}_2\text{O}$  condensed phase. Experiments performed on condensed ice samples.

| T [K]              | $\gamma$ | C <sup>(a)</sup><br>[molecules] | h <sup>(b)</sup><br>[nm] | $\text{HNO}_3$ (cond)<br>[molecules] | n                  | t <sup>(c)</sup><br>[s] | P( $\text{HNO}_3$ )<br>[Torr] | P( $\text{H}_2\text{O}$ )<br>[Torr] |
|--------------------|----------|---------------------------------|--------------------------|--------------------------------------|--------------------|-------------------------|-------------------------------|-------------------------------------|
| 180                | 0.29     | $4.50 \cdot 10^{18}$            | 100                      | $9.01 \cdot 10^{17}$                 | 4.1 <sup>(d)</sup> | 160                     | $1.6 \cdot 10^{-6}$           | $2.6 \cdot 10^{-6}$                 |
| 180                | 0.29     | $4.50 \cdot 10^{18}$            | 100                      | $1.21 \cdot 10^{18}$                 | 3.0 <sup>(e)</sup> | 560                     | $2.4 \cdot 10^{-6}$           | $1.3 \cdot 10^{-6}$                 |
| 180                | 0.31     | $4.65 \cdot 10^{19}$            | 1100                     | $8.80 \cdot 10^{17}$                 | 4.5 <sup>(f)</sup> | 185                     | $1.6 \cdot 10^{-5}$           | $8.7 \cdot 10^{-5}$                 |
| 180                | 0.31     | $4.65 \cdot 10^{19}$            | 1100                     | $1.34 \cdot 10^{18}$                 | 2.8 <sup>(f)</sup> | 530                     | $3.4 \cdot 10^{-5}$           | $4.4 \cdot 10^{-5}$                 |
| 190                | 0.25     | $2.78 \cdot 10^{18}$            | 65                       | $6.31 \cdot 10^{17}$                 | 1.2                | 145                     | $4.1 \cdot 10^{-5}$           | $2.5 \cdot 10^{-6}$                 |
| 190                | 0.27     | $9.01 \cdot 10^{19}$            | 2120                     | $1.12 \cdot 10^{18}$                 | 1.1                | 2450                    | $3.3 \cdot 10^{-4}$           | $4.5 \cdot 10^{-5}$                 |
| 200                | 0.18     | $1.19 \cdot 10^{19}$            | 280                      | $4.39 \cdot 10^{17}$                 | 1.8                | 120                     | $3.5 \cdot 10^{-5}$           | $1.9 \cdot 10^{-6}$                 |
| 200 <sup>(g)</sup> | 0.16     | $1.42 \cdot 10^{19}$            | 330                      | $1.64 \cdot 10^{18}$                 | 1.2                | 230                     | $6.0 \cdot 10^{-5}$           | $9.7 \cdot 10^{-6}$                 |
| 200 <sup>(g)</sup> | 0.15     | $2.87 \cdot 10^{19}$            | 670                      | $5.85 \cdot 10^{17}$                 | 0.9                | 495                     | $1.0 \cdot 10^{-5}$           | $1.1 \cdot 10^{-5}$                 |
| 200                | 0.16     | $3.89 \cdot 10^{19}$            | 916                      | $1.47 \cdot 10^{18}$                 | 1.1                | 401                     | $8.0 \cdot 10^{-5}$           | $2.3 \cdot 10^{-5}$                 |
| 200                | 0.19     | $1.11 \cdot 10^{20}$            | 2610                     | $4.01 \cdot 10^{18}$                 | 1.1                | 740                     | $3.0 \cdot 10^{-5}$           | $1.9 \cdot 10^{-6}$                 |

<sup>(a)</sup> Number of  $\text{H}_2\text{O}$  molecules condensed on the cold support.

<sup>(b)</sup> Thickness of the condensed ice sample ( $\rho = 0.92 \text{ gr cm}^{-3}$ ).

<sup>(c)</sup> Time at which the phase transition has been observed after the opening of the sample compartment.

<sup>(d)</sup> Value measured at  $t = 220 \text{ s}$  in **Figure 5.a**.

<sup>(e)</sup> Value measured at  $t = 620 \text{ s}$  in **Figure 5.a**.

<sup>(f)</sup> Same type of experiment as displayed in **Figure 5.a**.

<sup>(g)</sup> Experiments performed using the 8 mm aperture reactor.

Table E.7: Quantity of  $\text{HNO}_3$  in ML adsorbed on the condensed ice sample, mean distance  $d$  of penetration of  $\text{HNO}_3$  into the bulk and thickness  $h$  of the condensate.

| T [K] | Adsorbed $\text{HNO}_3$ /ML           | $d$ <sup>(a)</sup> [nm]                | $h$ [nm]                              |
|-------|---------------------------------------|----------------------------------------|---------------------------------------|
| 180   | 16 <sup>(b)</sup> /106 <sup>(c)</sup> | 3.7 <sup>(b)</sup> /8.6 <sup>(c)</sup> | 102 <sup>(b)</sup> /87 <sup>(c)</sup> |
| 180   | 20/104                                | 3.9/9.0                                | 741/94                                |
| 190   | 14/74                                 | 8.7/19.1                               | 56/22                                 |
| 190   | 10/132                                | 12.0/24.8                              | 2052/28                               |
| 200   | 15/52                                 | 15.6/39.8                              | 219/35                                |
| 200   | 35/193                                | 22.4/54.0                              | 252/45                                |
| 200   | 16/69                                 | 44.1/78.4                              | 346/85                                |
| 200   | 24/173                                | 33.3/70.3                              | 257/50                                |
| 200   | 35/472                                | 41.3/97.0                              | 1976/101                              |

<sup>(a)</sup>  $d = \sqrt{Dt}$ , where  $D = 1.37 \cdot 10^{-2610/T}$  [Thibert, 1998].

<sup>(b)</sup> Measured when  $\text{H}_2\text{O}$  partial pressure begins to decrease.

<sup>(c)</sup> Measured at the phase transition.

Table E.8: Uptake coefficient of  $\text{HNO}_3$  on solid ternary solutions of  $\text{H}_2\text{SO}_4/\text{HNO}_3/\text{H}_2\text{O}$ .

| T<br>[K] | $\text{H}_2\text{SO}_4$ <sup>(a)</sup><br>[wt %] | $\text{HNO}_3$ <sup>(a)</sup><br>[wt %] | Flow<br>[molecule $\text{s}^{-1}$ ] | $k_{\text{esc}}$<br>[ $\text{s}^{-1}$ ] | $\gamma_{\text{obs}}$ <sup>(b)</sup> |
|----------|--------------------------------------------------|-----------------------------------------|-------------------------------------|-----------------------------------------|--------------------------------------|
| 185      | 1                                                | 20                                      | $4.3 \cdot 10^{14}$                 | 1.6                                     | 0.11                                 |
| 185      | 1                                                | 20                                      | $5.4 \cdot 10^{14}$                 | 1.6                                     | 0.11                                 |
| 185      | 1                                                | 20                                      | $7.7 \cdot 10^{14}$                 | 1.4                                     | 0.12                                 |
| 190      | 5                                                | 40                                      | $9.5 \cdot 10^{13}$                 | 2.2                                     | 0.08                                 |
| 190      | 5                                                | 40                                      | $2.3 \cdot 10^{14}$                 | 2.1                                     | 0.12                                 |
| 192      | 20                                               | 20                                      | $5.4 \cdot 10^{14}$                 | 1.9                                     | 0.12                                 |
| 192      | 20                                               | 20                                      | $7.4 \cdot 10^{14}$                 | 1.7                                     | 0.10                                 |
| 195      | 50                                               | 1                                       | $3.4 \cdot 10^{14}$                 | 1.9                                     | 0.09                                 |
| 195      | 50                                               | 1                                       | $6.0 \cdot 10^{14}$                 | 2.1                                     | 0.08                                 |

<sup>(a)</sup> STS compositions from Carslaw *et al.* [1994].

<sup>(b)</sup> No correction has been applied on  $\gamma$  values due to large  $\text{HNO}_3$  flow rates used in these experiments (see Part D for details).
